# Supplementary material
Source: Springer Nature journal article supplement (https://www.springermedizin.de/resource/supplementary/12875_2013_1013_MOESM4_ESM.pdf/9435934)
Supplement: MOESM4 [file 9435934]

**Table 4. Associations between patient factors and doctor detection**

| Patient factor                                                | Detected, n(%) | Not detected, n(%) | $\chi^2$ (df) | Multiple logistic regression (n = 7346) <sup>a</sup> |                      |
|---------------------------------------------------------------|----------------|--------------------|---------------|------------------------------------------------------|----------------------|
|                                                               |                |                    |               | Wald $\chi^2$ (df) <sup>b</sup>                      | Adj. OR (95% CI)     |
| <b>Gender</b>                                                 |                |                    | 70.80 (1)**   | 23.70 (1)**                                          | 4.38 (1)*            |
| Male                                                          | 155 (25.5)     | 3795 (42.9)        |               | 1.00                                                 | 1.00                 |
| Female                                                        | 453 (74.5)     | 5053 (57.1)        |               | 1.89 (1.46 - 2.44)                                   | 1.35 (1.02 - 1.78)   |
| <b>Age Group</b>                                              |                |                    | 34.76 (2)**   | 10.08 (2)**                                          | 7.94 (2)*            |
| 18-34 yrs                                                     | 102 (17.1)     | 2351 (27.0)        |               | 1.00                                                 | 1.00                 |
| 35-54 yrs                                                     | 216 (36.2)     | 3120 (35.9)        |               | 1.71 (1.23 - 2.39)                                   | 1.65 (1.14 - 2.39)   |
| 55+ yrs                                                       | 279 (46.7)     | 3225 (37.1)        |               | 1.61 (1.05 - 2.49)                                   | 1.86 (1.14 - 3.01)   |
| <b>Education</b>                                              |                |                    | 23.68 (1)**   | 0.17 (1)                                             | 0.03 (1)             |
| Secondary or above                                            | 407 (67.5)     | 6721 (76.3)        |               | 1.00                                                 | 1.00                 |
| Primary or no formal education                                | 196 (32.5)     | 2090 (23.7)        |               | 0.94 (0.71 - 1.25)                                   | 1.03 (0.75 - 1.41)   |
| <b>Marital Status</b>                                         |                |                    | 1.73 (1)      | 0.80 (1)                                             | 0.40 (1)             |
| Married                                                       | 355 (59.1)     | 5422 (61.5)        |               | 1.00                                                 | 1.00                 |
| Single/Separated/Divorced/Widowed                             | 246 (40.9)     | 3391 (38.5)        |               | 1.11 (0.88 - 1.41)                                   | 0.92 (0.70 - 1.20)   |
| <b>Working Status</b>                                         |                |                    | 117.95 (4)**  | 38.85 (4)**                                          | 20.62 (4)**          |
| Employed                                                      | 260 (44.4)     | 5578 (64.0)        |               | 1.00                                                 | 1.00                 |
| Unemployed                                                    | 26 (4.4)       | 135 (1.5)          |               | 3.53 (2.06 - 6.05)                                   | 1.56 (0.78 - 3.13)   |
| Retired                                                       | 167 (28.5)     | 1827 (21.0)        |               | 2.00 (1.40 - 2.84)                                   | 2.16 (1.45 - 3.21)   |
| House-maker                                                   | 115 (19.6)     | 902 (10.3)         |               | 2.02 (1.46 - 2.80)                                   | 2.05 (1.41 - 2.97)   |
| Student                                                       | 18 (3.1)       | 275 (3.2)          |               | 1.62 (0.83 - 3.17)                                   | 1.18 (0.56 - 2.46)   |
| <b>Household monthly income</b>                               |                |                    | 19.86 (1)**   | 3.56 (1)                                             | 0.07 (1)             |
| More than HK\$30,000                                          | 146 (28.5)     | 2947 (38.3)        |               | 1.00                                                 | 1.00                 |
| HK\$30,000 or below                                           | 367 (71.5)     | 4746 (61.7)        |               | 1.27 (0.99 - 1.63)                                   | 1.04 (0.79 - 1.37)   |
| <b>Ethnicity</b>                                              |                |                    | 1.82 (1)      | 12.53 (1)**                                          | 5.36 (1)*            |
| Chinese                                                       | 603 (95.3)     | 8703 (96.3)        |               | 1.00                                                 | 1.00                 |
| Non-Chinese                                                   | 30 (4.7)       | 333 (3.7)          |               | 2.52 (1.51 - 4.20)                                   | 2.01 (1.11 - 3.63)   |
| <b>Smoking habit</b>                                          |                |                    | 1.16 (1)      | 0.86 (1)                                             | 0.10 (1)             |
| Non- or ex-smoker                                             | 537 (88.5)     | 7656 (87.0)        |               | 1.00                                                 | 1.00                 |
| Current smoker                                                | 70 (11.5)      | 1149 (13.0)        |               | 1.18 (0.83 - 1.67)                                   | 0.94 (0.64 - 1.39)   |
| <b>Alcohol use</b>                                            |                |                    | 4.99 (1)*     | 0.13 (1)                                             | 0.00 (1)             |
| Less than once a week or never                                | 548 (90.3)     | 7681 (87.2)        |               | 1.00                                                 | 1.00                 |
| More than once a week                                         | 59 (9.7)       | 1131 (12.8)        |               | 1.07 (0.74 - 1.54)                                   | 1.00 (0.67 - 1.50)   |
| <b>Regular exercise pattern</b>                               |                |                    | 20.92 (1)**   | 18.66 (1)**                                          | 10.58 (1)**          |
| Yes                                                           | 394 (65.1)     | 6465 (73.7)        |               | 1.00                                                 | 1.00                 |
| No exercise at all                                            | 211 (34.9)     | 2313 (26.3)        |               | 1.62 (1.30 - 2.02)                                   | 1.51 (1.18 - 1.93)   |
| <b>Seen a doctor in past 4 weeks</b>                          |                |                    | 65.72 (1)**   | 35.67 (1)**                                          | 8.15 (1)**           |
| No                                                            | 196 (31.0)     | 4302 (47.7)        |               | 1.00                                                 | 1.00                 |
| More than once                                                | 436 (69.0)     | 4726 (52.3)        |               | 1.96 (1.57 - 2.44)                                   | 1.43 (1.12 - 1.83)   |
| <b>Seen a TCM practitioner in past 4 weeks</b>                |                |                    | 14.86 (1)**   | 2.04 (1)                                             | 0.17 (1)             |
| No                                                            | 469 (74.2)     | 7275 (80.5)        |               | 1.00                                                 | 1.00                 |
| More than once                                                | 163 (25.8)     | 1758 (19.5)        |               | 1.20 (0.93 - 1.54)                                   | 0.94 (0.70 - 1.26)   |
| <b>Disease co-morbidity</b>                                   |                |                    | 65.21 (2)**   | 17.64 (2)**                                          | 0.97 (2)             |
| None                                                          | 221 (36.4)     | 4413 (50.1)        |               | 1.00                                                 | 1.00                 |
| One                                                           | 150 (24.7)     | 2216 (25.1)        |               | 1.29 (0.97 - 1.72)                                   | 1.05 (0.76 - 1.44)   |
| Two or more                                                   | 236 (38.9)     | 2188 (24.8)        |               | 1.88 (1.40 - 2.53)                                   | 1.18 (0.84 - 1.65)   |
| <b>Family history mental illness</b>                          |                |                    | 70.56 (1)**   | 48.24 (1)**                                          | 9.53 (1)**           |
| No                                                            | 483 (81.5)     | 7919 (91.7)        |               | 1.00                                                 | 1.00                 |
| Yes                                                           | 110 (18.5)     | 721 (8.3)          |               | 2.61 (1.99 - 3.43)                                   | 1.66 (1.20 - 2.29)   |
| <b>Service Sector</b>                                         |                |                    | 2042 (1)      | 1.89 (1)                                             | 4.34 (1)*            |
| Public                                                        | 183 (28.8)     | 2355 (26.0)        |               | 1.00                                                 | 1.00                 |
| Private                                                       | 453 (71.2)     | 6714 (74.0)        |               | 1.20 (0.93 - 1.55)                                   | 1.36 (1.02 - 1.83)   |
| <b>Symptom severity/ PHQ-9 score<sup>c</sup></b>              |                |                    | 779.72 (4)**  |                                                      | 147.03 (4)**         |
| Minimal/ score 0-4                                            | 175 (29.1)     | 5725 (65.0)        |               |                                                      | 1.00                 |
| Mild/ score 5-9                                               | 178 (29.6)     | 2260 (25.6)        |               |                                                      | 2.16 (1.63 - 2.86)   |
| Moderate/ score 10-14                                         | 135 (22.4)     | 622 (7.1)          |               |                                                      | 4.67 (3.34 - 6.53)   |
| Mod-severe/ score 15-19                                       | 72 (12.0)      | 162 (1.8)          |               |                                                      | 8.53 (5.41 - 13.46)  |
| Severe/ score 20-27                                           | 42 (7.0)       | 43 (0.5)           |               |                                                      | 10.42 (5.20 - 20.89) |
| <b>Self-reported depression history<sup>c</sup></b>           |                |                    | 1564.17 (1)** |                                                      | 85.05 (1)**          |
| No                                                            | 314 (52.8)     | 8369 (95.7)        |               |                                                      | 1.00                 |
| Yes                                                           | 281 (42.6)     | 378 (4.3)          |               |                                                      | 10.16 (7.73 - 13.34) |
| <b>Self-reported other mental illness history<sup>c</sup></b> |                |                    | 330.67 (1)**  |                                                      | 43.68 (1)**          |
| No                                                            | 450 (83.2)     | 8425 (97.6)        |               |                                                      | 1.00                 |
| Yes                                                           | 91 (16.8)      | 211 (2.4)          |               |                                                      | 2.89 (1.93 - 4.31)   |

\*  $p < .05$ ; \*\*  $p < .01$

<sup>a</sup> Model Chi-square = 872.43, df = 26,  $p < 0.001$ ; Nagelkerke R-square = 0.320; Hosmer & Lemeshow Test, Chi-square = 17.79, df = 8,  $p = 0.023$

<sup>b</sup> Wald test statistics are shown in italic.

<sup>c</sup> Factors entered in second block of the regression model; Block Chi-square = 591.50, df = 6,  $p < .001$ .
